# Supplementary material for: The effect of weighted blankets on sleep and related disorders: a brief review
Source: PubMed Central journal article supplement (PMC11056563; doi:10.3389/fpsyt.2024.1333015), 2024-04-15
Supplement: Image_1.pdf [file Image_1.pdf]

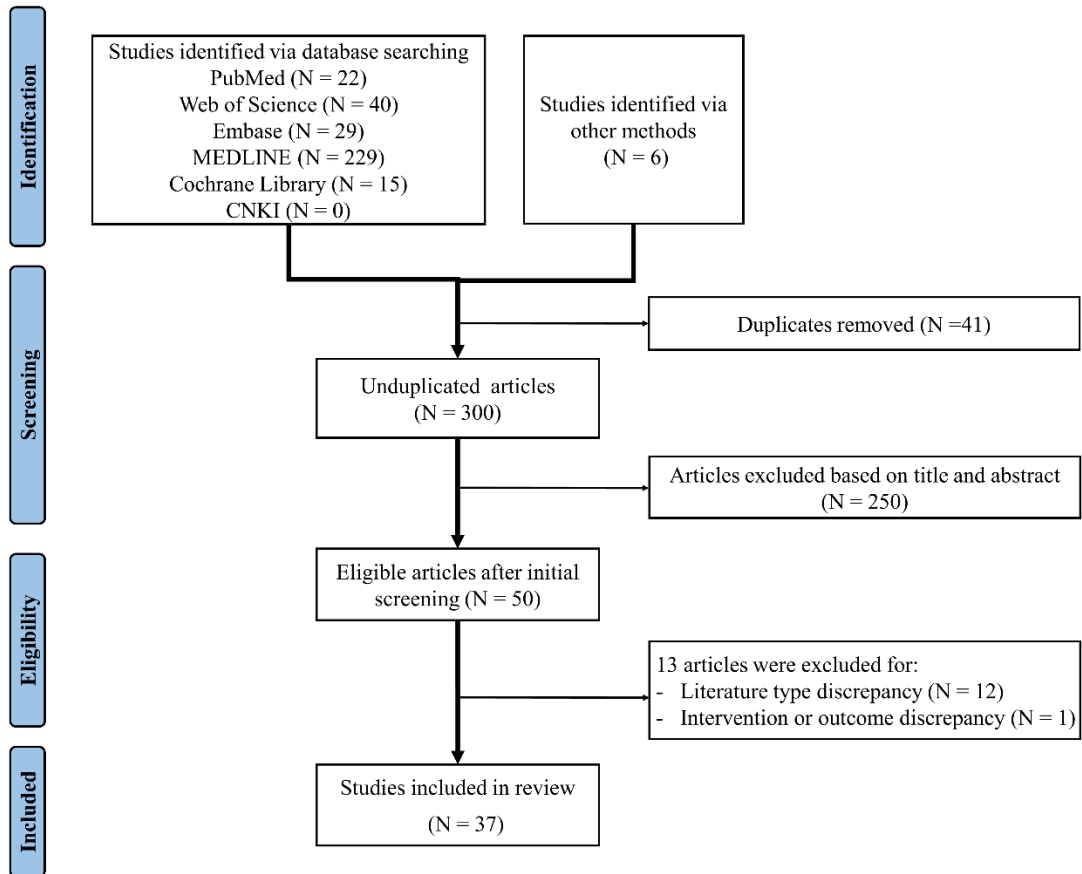

**Figure 1. Study flow chart**
